# Supplementary material for: Predicting Positive p53 Cancer Rescue Regions Using Most Informative Positive (MIP) Active Learning
Source: PLoS Comput Biol. 2009 Sep 4;5(9):e1000498. doi: 10.1371/journal.pcbi.1000498 (PMC2742196; doi:10.1371/journal.pcbi.1000498)
Supplement: Text S1 — Active Learning Related Symbols (0.06 MB DOC) [file pcbi.1000498.s003.doc]

# Text S1: Active Learning Related Symbols

: In the case of p53 cancer rescue mutants, indicates the amino acid number at which certain mutations occur.

: The activity label for a data point . For a binary class, it is convenient to call these labels “Positive” and “Negative”.

: The activity label for a data point as predicted by the computational classifier.

Halfway Point: The smallest number of iterations such that contains half of all Positive mutants in .

: The current active learning iteration. during the initial experiment.

: An attribute vector describing each data point.

: The number of data points chosen during each to become during *in silico* experimentation.

: A function that assigns a score for ranking data points in .

: The set of all data points under consideration, both the labeled and unlabeled examples.

: The initial subset of data points chosen from to be labeled.

: The subset of containing all labeled (known) data points at the th iteration.

: The initial subset of containing all unlabeled (unknown) data points.

: The number of data points in data in set . .
